# Supplementary material
Source: PubMed Central journal article supplement (PMC8110209)
Supplement: mmc1.pdf [file mmc1.pdf]

# THE LANCET

## Infectious Diseases

### Supplementary appendix

This appendix formed part of the original submission and has been peer reviewed. We post it as supplied by the authors.

Supplement to: Lund LC, Hallas J, Nielsen H, et al. Post-acute effects of SARS-CoV-2 infection in individuals not requiring hospital admission: a Danish population-based cohort study. *Lancet Infect Dis* 2021; published online May 10. [https://doi.org/10.1016/S1473-3099\(21\)00211-5](https://doi.org/10.1016/S1473-3099(21)00211-5).

## Supplementary material

### Appendix

Appendix S1. Outcome definition for acute kidney injury.

### Figures

Figure S1. Propensity score distributions for non-hospitalised individuals tested positive or negative for SARS-CoV-2.

Figure S2. Area graph depicting the proportion of individuals having reached a maximum severity healthcare state during follow-up for each cohort.

Figure S3. Histogram of the number of general practitioner and hospital outpatient clinic visits for SARS-CoV-2 positive and test-negative individuals.

### Tables

Table S1. List of outcomes, components of outcomes, ICD-10 and ATC codes used to define outcomes

Table S2. ICD-10 and ATC codes used to define baseline covariates included in the propensity score model

Table S3. Number of events, risks, risk differences and risk ratios for the initiation of drug groups potentially representing post-acute effects of COVID-19 during the period 2 weeks to 6 months after a SARS-CoV-2 test.

Table S4. Number of events, risks, risk differences and risk ratios for hospital diagnoses potentially representing post-acute effects of COVID-19 during the period 2 weeks to 6 months after a SARS-CoV-2 test.

Table S5. Rates of health care utilisation 6 months to 2 weeks before and 2 weeks to 6 months after a SARS-CoV-2 test.

Table S6. Number of reinitiators and risk estimates for drugs suspected to represent delayed complications of SARS-CoV-2 infection during the period 2 weeks to 6 months after a SARS-CoV-2 test.

Table S7. Number of readmissions and risk estimates for diagnoses suspected to represent delayed complications of SARS-CoV-2 infection during the period 2 weeks to 6 months after a SARS-CoV-2 test.

Table S8. Hypothesis-free screening for increased risks of initiating a given drug 2 weeks to 6 months after SARS-CoV-2 infection

Table S9. Hypothesis-free screening for increased risks of receiving first hospital diagnoses 2 weeks to 6 months after SARS-CoV-2 infection.

Table S10. Baseline characteristics of individuals with non-hospitalised SARS-CoV-2 infection and individuals hospitalised with SARS-CoV-2 infection.

Table S11. Number of initiators and risks for drugs suspected to represent delayed complications of SARS-CoV-2 infection during the period 2 weeks to 6 months after a SARS-CoV-2 test.

Table S12. Number of first-ever diagnoses and risks for diagnoses suspected to represent delayed complications of SARS-CoV-2 infection during the period 2 weeks to 6 months after a SARS-CoV-2 test.

Table S13. Number of events, risks, risk differences and risk ratios for the initiation of drug groups potentially representing post-acute effects of COVID-19 during the period 2 to 14 weeks after a SARS-CoV-2 test.

Table S14. Number of events, risks, risk differences and risk ratios for hospital diagnoses potentially representing post-acute effects of COVID-19 during the period 2 to 14 weeks after a SARS-CoV-2 test.

Table S15. Rates of health care utilisation 14 to 2 weeks before and 2 to 14 weeks after a SARS-CoV-2 test.

**Appendix S1. Outcome definition used for acute kidney injury.**

The outcome of acute kidney injury was defined based on Kidney Disease Improving Global Outcomes guideline criteria (Kidney International Supplements(2012)2,1; doi:10.1038/kisup.2012.1). Any creatinine measurement taken during follow up was evaluated. For each measurement, baseline creatinine was calculated as the median creatinine during the period 365-7 days prior to the measurement being evaluated. To ensure that the onset of the acute kidney injury was recent, i.e. not during the primary SARS-CoV-2 infection, we demanded a “normal” creatinine measurement ( $\pm 10\%$  of the baseline creatinine) up to 7 days prior to the measurement being evaluated. Creatinine measurements that greater than 1.5 times the baseline value were considered to represent acute kidney injury. In the case of missing creatinine measurements, individuals were considered not to have had acute kidney injury during follow-up.

Figure S1. Propensity score distributions for non-hospitalised individuals tested positive or negative for SARS-CoV-2.

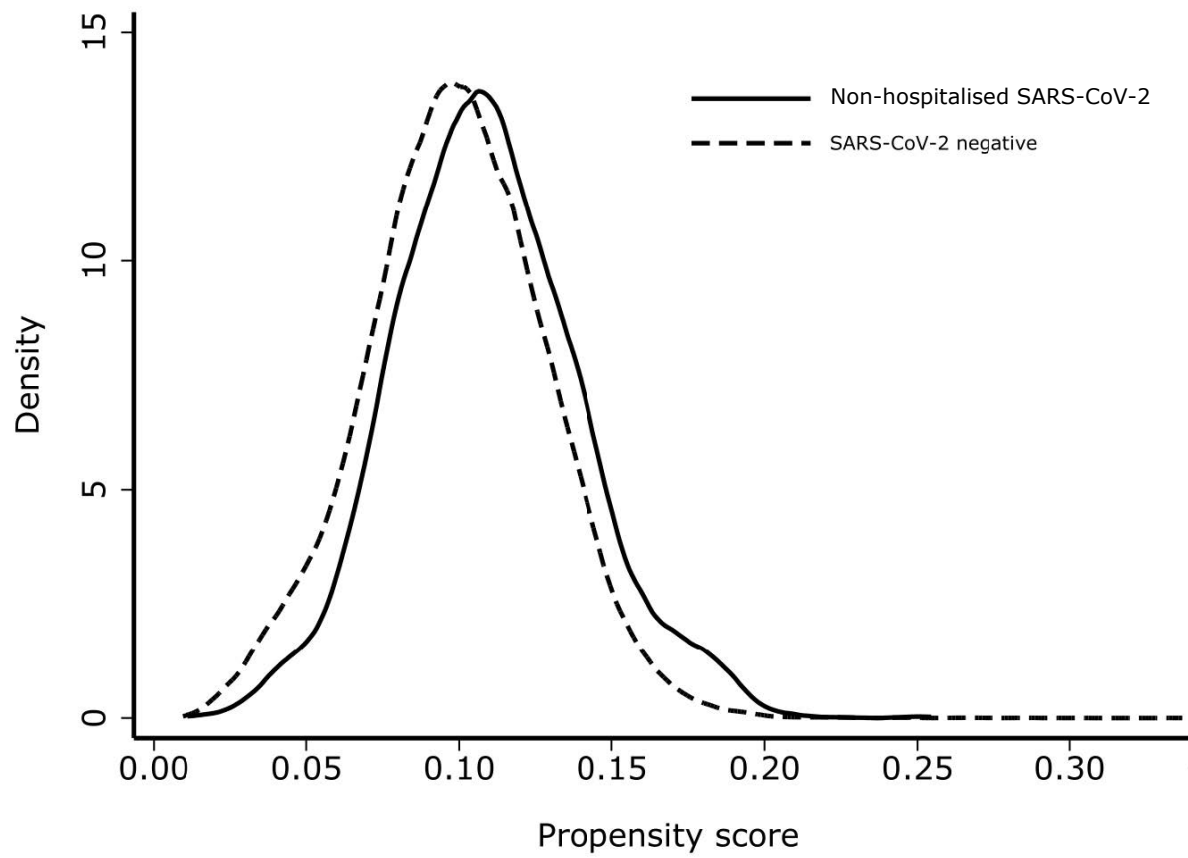

**Figure S2. Area graph depicting the proportion of individuals having reached a maximum severity healthcare state during follow-up for each non-hospitalised cohort.**  
The possible states are (in ascending order): no health care visits, GP visit, hospital outpatient clinic visit, emergency department visit, inpatient hospitalisation, death

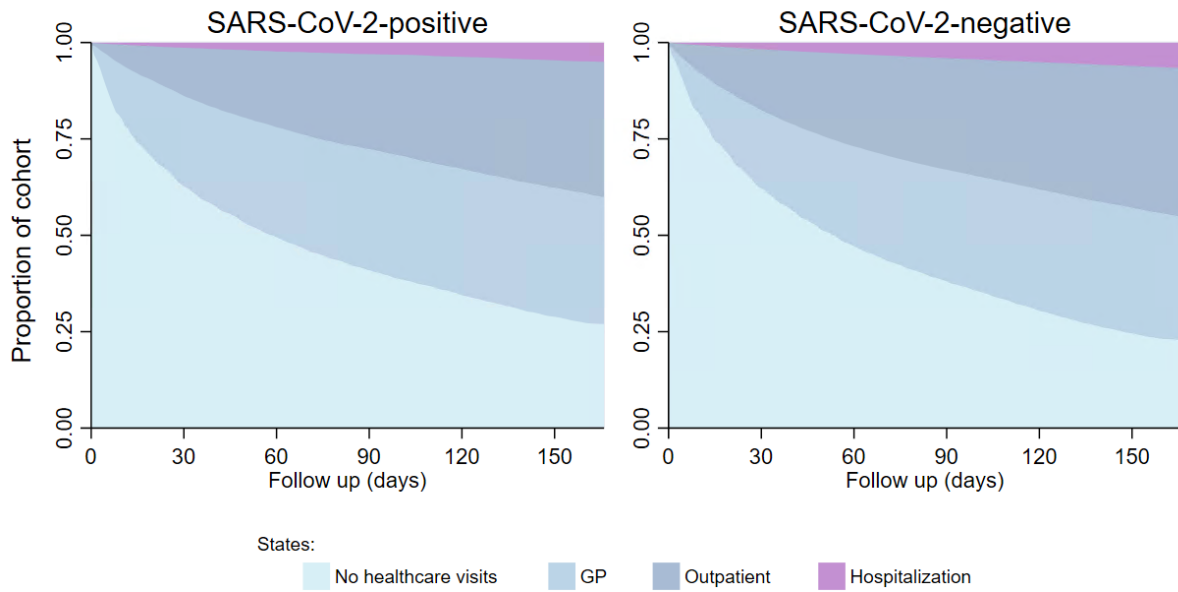

**Figure S3. Histogram of the number of general practitioner and hospital outpatient clinic visits for SARS-CoV-2 positive and test-negative individuals.**

A) General practitioner visits

B) Hospital outpatient clinic visits

A)

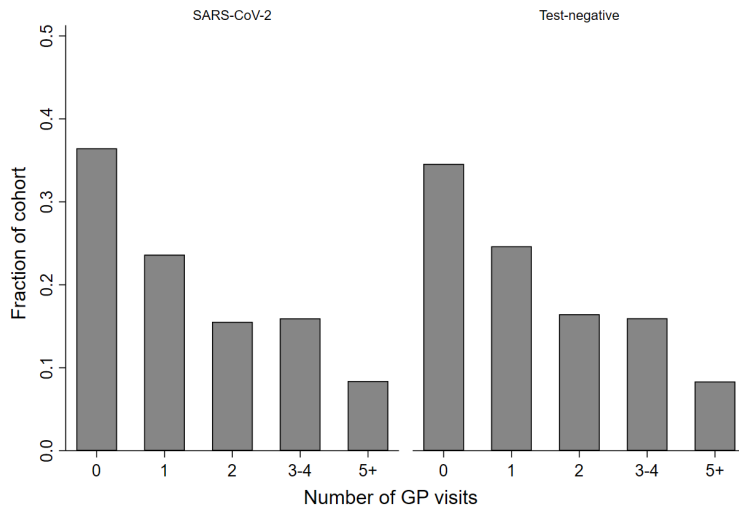

B)

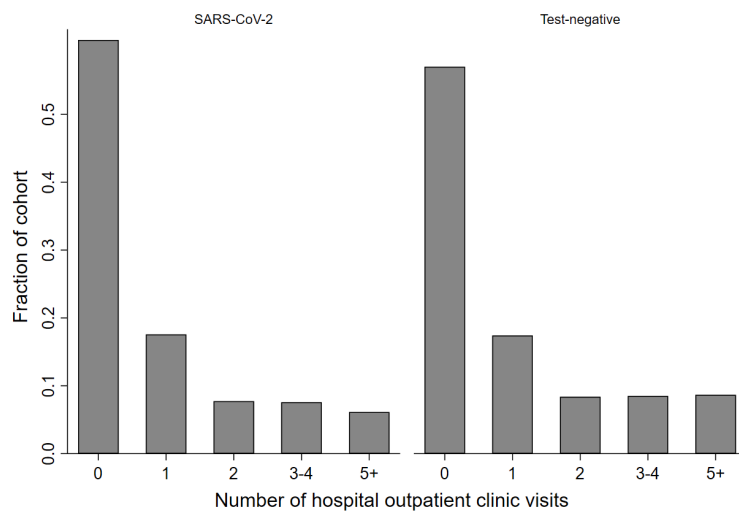

**Table S1. List of outcomes, components of outcomes, ICD-10 and ATC codes used to define outcomes**

| <b>Outcome</b>                     | <b>Components</b>                                                                                                                                                                              | <b>Coding system</b> | <b>Codes</b>                                        |
|------------------------------------|------------------------------------------------------------------------------------------------------------------------------------------------------------------------------------------------|----------------------|-----------------------------------------------------|
| <b>Delayed acute complications</b> |                                                                                                                                                                                                |                      |                                                     |
| Myocarditis                        | -                                                                                                                                                                                              | ICD-10               | I40, I41, I541                                      |
| Venous thromboembolism             | Pulmonary embolism, deep vein thrombosis                                                                                                                                                       | ICD-10               | I26, I801, I802, I803, I808, I809, I822, I823, I829 |
| Arterial embolism and thrombosis   | -                                                                                                                                                                                              | ICD-10               | I739, I74, I779                                     |
| Ischaemic stroke or TIA            | -                                                                                                                                                                                              | ICD-10               | I63, I64, G45                                       |
| Cerebral haemorrhage               | -                                                                                                                                                                                              | ICD-10               | I60-I62                                             |
| Guillain-Barré syndrome            | -                                                                                                                                                                                              | ICD-10               | G610                                                |
| Encephalitis                       | -                                                                                                                                                                                              | ICD-10               | G04, G05                                            |
| Psychosis                          | -                                                                                                                                                                                              | ICD-10               | F20-F29 excl. F21, F30                              |
| Kawasaki disease                   | -                                                                                                                                                                                              | ICD-10               | M303                                                |
| PIMS-related diagnoses             | -                                                                                                                                                                                              | ICD-10               | M303, A483, I40, I41                                |
| Acute kidney injury                | Defined using creatinine measurements according to KDIGO guidelines                                                                                                                            | ICD-10               | -                                                   |
| <b>Chronic disease</b>             |                                                                                                                                                                                                |                      |                                                     |
| Pulmonary disease                  | Asthma, chronic obstructive pulmonary disease, bronchiectasis, other chronic lower respiratory diseases, interstitial lung diseases, lung absces, lung empyema, pneumothorax, pleural effusion | ICD-10               | J40-J47, J80-J99                                    |
| Interstitial pulmonary fibrosis    | -                                                                                                                                                                                              | ICD-10               | J841                                                |
| Cardiovascular disease             | Ischaemic heart disease, pulmonary embolism, pericarditis, myocarditis, supraventricular tachycardias, heart failure, ischaemic stroke                                                         | ICD-10               | I20-I25, I26, I30-I32, I40-I43, I47-150, I63, I64   |
| Heart failure                      | -                                                                                                                                                                                              | ICD-10               | I50                                                 |
| Diabetes mellitus                  | Type 1 diabetes, type 2 diabetes                                                                                                                                                               | ICD-10               | E10-E14                                             |
| Neurological disease               | Encephalitis, myelitis, encephalomyelitis, epilepsy, migraine, other headache syndromes, neuropathies                                                                                          | ICD-10               | G04, G05, G40, G43, G44, G45, G50-G59, G60-G64      |



|                                                     |                                                                                                        |        |                                                                                                               |
|-----------------------------------------------------|--------------------------------------------------------------------------------------------------------|--------|---------------------------------------------------------------------------------------------------------------|
| Neuropathies                                        | -                                                                                                      | ICD-10 | G50-59, G60-G64                                                                                               |
| Psychiatric illness                                 | Psychoses, affective disorders, neurotic- and stress disorders                                         | ICD-10 | F20-F29,<br>F30-F39, F40-F48                                                                                  |
| Depression                                          | -                                                                                                      | ICD-10 | F32                                                                                                           |
| Anxiety disorders                                   | -                                                                                                      | ICD-10 | F41 F43                                                                                                       |
| <b>Persisting symptoms<br/>(hospital diagnoses)</b> |                                                                                                        |        |                                                                                                               |
| Dyspnoea                                            | -                                                                                                      | ICD-10 | R060                                                                                                          |
| Cough                                               | -                                                                                                      | ICD-10 | R05                                                                                                           |
| Anosmia                                             | -                                                                                                      | ICD-10 | R430                                                                                                          |
| Headache                                            | -                                                                                                      | ICD-10 | R51, G43, G44                                                                                                 |
| Fatigue related disorders                           | -                                                                                                      | ICD-10 | R53, G933                                                                                                     |
| Nonspecific pain                                    | -                                                                                                      | ICD-10 | R52                                                                                                           |
| <b>Prescription drug use</b>                        |                                                                                                        |        |                                                                                                               |
| Bronchodilating agents                              | Inhaled short- and long-acting beta-2 agonists, short- and long-acting muscarinic receptor antagonists |        | R03AC02-04, R03AC12-13,<br>R03AC18-19, R03AK06-08,<br>R03AK10-11, R03AL01-09,<br>R03CC02, R03BB01, R03BB04-07 |
|                                                     |                                                                                                        | ATC    |                                                                                                               |
| SABA                                                | -                                                                                                      | ATC    | R03AC02-04, R03AL01-02,<br>R03CC02                                                                            |
| ICS                                                 | -                                                                                                      | ATC    | R03BA, R0AK, R03AL08,<br>R03AL09                                                                              |
| Cough preparations                                  | Oral codeine and dextromethorphan                                                                      | ATC    | R05DA04, R05DA09                                                                                              |
| Paracetamol                                         | -                                                                                                      | ATC    | N02BE01                                                                                                       |
| NSAIDs                                              | -                                                                                                      | ATC    | M01A excl. M01AX                                                                                              |
| Opioids and opioid-like drugs                       | -                                                                                                      | ATC    | N02A                                                                                                          |
| Triptans                                            | -                                                                                                      | ATC    | N02CC                                                                                                         |
| Glucose lowering drugs                              | Oral antidiabetic drugs and insulin                                                                    | ATC    | A10                                                                                                           |
| Antidepressants                                     | -                                                                                                      | ATC    | N06A                                                                                                          |

|                             |                                                                         |     |                                                               |
|-----------------------------|-------------------------------------------------------------------------|-----|---------------------------------------------------------------|
| Benzodiazapines and Z-drugs | Benzodiazepines and non-benzodiazepine benzodiazepine receptor agonists | ATC | N05BA, N05CF                                                  |
| Antipsychotics              | First and second generation antipsychotics                              | ATC | N05A                                                          |
| Platelet inhibitors         | Aspirin, clopidogrel, prasugrel, ticagrelor, dipyridamol                | ATC | B01AC06, B01AC07, B01AC22, B01AC24, B01AC30, N02BA01, B01AC04 |
| Anticoagulants              | Direct-acting oral anticoagulants, vitamin-K antagonists                | ATC | B01AA03, B01AA04, B01AF01-B01AF03, B01AE07                    |

ICD-10 = International Statistical Classification of Diseases and Health Related Problems 10th revision

ATC = Anatomical Therapeutical Chemical Classification

**Table S2. ICD-10 and ATC codes used to define baseline covariates included in the propensity score model**

| <b>Covariate</b>              | <b>Coding system</b> | <b>Codes</b>                                                                                 |
|-------------------------------|----------------------|----------------------------------------------------------------------------------------------|
| <b>Medical conditions</b>     |                      |                                                                                              |
| Pulmonary disease             | ICD-10               | J40-J47, J80-J99                                                                             |
| Cardiovascular disease        | ICD-10               | I20-I25, I26, I30-I32, I40-I43, I47-I50, I63, I64                                            |
| Chronic kidney disease        | ICD-10               | N00, N01, N03-N06, N08.8, N14.1, N14.2, N16.8, N17, N25.1, N26, N27                          |
| Markers of smoking            | ICD-10               | J41-J44, F17, Z71.6, Z72.0                                                                   |
| Alcohol related disorders     | ICD-10               | F10, E24.4, G31.2, G62.1, G72.1, I42.6, K29.2, K70, K85.2, K86.0, Q86.0, Z50.2, Z71.4, Z72.1 |
| Dementia                      | ICD-10               | F01-F04                                                                                      |
| Obesity                       | ICD-10               | E66                                                                                          |
| Cancer                        | ICD-10               | C00-C97, excluding C44                                                                       |
| <b>Prescription drug use</b>  |                      |                                                                                              |
| Opioids and opioid-like drugs | ATC                  | N02A                                                                                         |
| Glucose lowering drugs        | ATC                  | A10                                                                                          |
| Antipsychotics                | ATC<br>ATC           | N05A                                                                                         |
| Platelet inhibitors           | ATC                  | B01AC06, B01AC07, B01AC22, B01AC24, B01AC30, N02BA01, B01AC04                                |
| VKA and DOACs                 |                      | B01AA03, B01AA04, B01AF01-B01AF03, B01AE07                                                   |
| Antihypertensives             | ATC                  | C08, C03A, C07, C09                                                                          |
| Antidiabetic drugs            | ATC                  | A10                                                                                          |
| Loop diuretics                | ATC                  | C03CA, C03CB                                                                                 |
| Lipid lowering drugs*         | ATC                  | C10AA, C10AB                                                                                 |

ICD-10 = International Statistical Classification of Diseases and Health Related Problems 10th revision

ATC = Anatomical Therapeutical Chemical Classification

\* = Not included in the propensity score model

**Table S3. Number of events, risks, risk differences and risk ratios for the initiation of drug groups potentially representing post-acute effects of SARS-CoV-2 infection during the period 2 weeks to 6 months after a SARS-CoV-2 test.**

| Drug group                                         | Non-hospitalised<br>SARS-CoV-2 | Test-negative         | Unweighted             |                      | PS weighted            |                     |
|----------------------------------------------------|--------------------------------|-----------------------|------------------------|----------------------|------------------------|---------------------|
|                                                    | Risk: n/N (%)                  | Risk: n/N (%)         | RD: % (95% CI)         | RR (95% CI)          | RD: % (95% CI)         | RR (95% CI)         |
| Bronchodilating agents                             | 121/6782 (1.78)                | 814/55482 (1.47)      | 0.32 (-0.01 to 0.65)   | 1.22 (1.01 to 1.47)  | 0.33 (-0.00 to 0.66)   | 1.23 (1.01 to 1.48) |
| SABA                                               | 117/6935 (1.69)                | 743/57206 (1.30)      | 0.39 (0.07 to 0.71)    | 1.30 (1.07 to 1.58)  | 0.41 (0.09 to 0.73)    | 1.32 (1.09 to 1.60) |
| ICS                                                | 57/7696 (0.74)                 | 733/64870 (1.13)      | -0.39 (-0.60 to -0.18) | 0.66 (0.50 to 0.86)  | -0.39 (-0.60 to -0.18) | 0.65 (0.50 to 0.86) |
| Cough preparations                                 | 28/7456 (0.38)                 | 262/64857 (0.40)      | -0.03 (-0.18 to 0.12)  | 0.93 (0.63 to 1.37)  | 0.00 (-0.14 to 0.15)   | 1.01 (0.68 to 1.49) |
| Paracetamol                                        | 153/4781 (3.20)                | 1422/39052 (3.64)     | -0.44 (-0.97 to 0.09)  | 0.88 (0.75 to 1.04)  | -0.37 (-0.90 to 0.17)  | 0.90 (0.76 to 1.06) |
| NSAIDs                                             | 83/3234 (2.57)                 | 745/24688 (3.02)      | -0.45 (-1.04 to 0.13)  | 0.85 (0.68 to 1.06)  | -0.44 (-1.03 to 0.15)  | 0.85 (0.68 to 1.07) |
| Opioids and opioid-like drugs                      | 72/6316 (1.14)                 | 721/51042 (1.41)      | -0.27 (-0.55 to 0.01)  | 0.81 (0.63 to 1.03)  | -0.26 (-0.54 to 0.02)  | 0.81 (0.64 to 1.04) |
| Triptans                                           | 33/8292 (0.40)                 | 198/72828 (0.27)      | 0.13 (-0.01 to 0.27)   | 1.46 (1.01 to 2.11)  | 0.14 (0.00 to 0.28)    | 1.55 (1.07 to 2.25) |
| Glucose lowering drugs                             | 23/8457 (0.27)                 | 254/75984 (0.33)      | -0.06 (-0.18 to 0.06)  | 0.81 (0.53 to 1.25)  | -0.01 (-0.13 to 0.10)  | 0.95 (0.62 to 1.46) |
| Antidepressants<br>Benzodiazapines and Z-<br>drugs | 47/7324 (0.64)                 | 478/58620 (0.82)      | -0.17 (-0.37 to 0.02)  | 0.79 (0.58 to 1.06)  | -0.12 (-0.32 to 0.07)  | 0.84 (0.62 to 1.13) |
| 42/7364 (0.57)                                     | 368/61354 (0.60)               | -0.03 (-0.21 to 0.15) | 0.95 (0.69 to 1.31)    | 0.01 (-0.17 to 0.20) | 1.03 (0.75 to 1.41)    |                     |
| Antipsychotics                                     | 24/8527 (0.28)                 | 271/74255 (0.36)      | -0.08 (-0.20 to 0.04)  | 0.77 (0.51 to 1.17)  | -0.02 (-0.14 to 0.10)  | 0.93 (0.61 to 1.42) |
| Platelet inhibitors                                | 28/8229 (0.34)                 | 284/72700 (0.39)      | -0.05 (-0.18 to 0.08)  | 0.87 (0.59 to 1.28)  | -0.04 (-0.18 to 0.09)  | 0.88 (0.60 to 1.30) |
| Anticoagulants                                     | 23/8659 (0.27)                 | 209/77469 (0.27)      | -0.00 (-0.12 to 0.11)  | 0.98 (0.64 to 1.51)  | 0.01 (-0.11 to 0.12)   | 1.03 (0.67 to 1.59) |
| Antihypertensives                                  | 58/6856 (0.85)                 | 525/59086 (0.89)      | -0.04 (-0.27 to 0.19)  | 0.95 (0.73 to 1.25)  | -0.03 (-0.26 to 0.20)  | 0.97 (0.74 to 1.27) |

RD = Risk difference, RR = Risk ratio, SABA = Short-acting beta-2 agonists, ICS = inhaled corticosteroids, NSAIDs = Non-steroidal anti-inflammatory drugs, PS = Propensity score, CI = Confidence interval

**Table S4. Number of events, risks, risk differences and risk ratios for hospital diagnoses potentially representing post-acute effects of SARS-CoV-2 infection during the period 2 weeks to 6 months after a SARS-CoV-2 test.**

| Diagnosis                          | Non-hospitalised            | Test-negative   | Unweighted             |                     | PS weighted            |                     |
|------------------------------------|-----------------------------|-----------------|------------------------|---------------------|------------------------|---------------------|
|                                    | SARS-CoV-2<br>Risk: n/N (%) |                 | Risk: n/N (%)          | RD: % (95% CI)      | RR (95% CI)            | RD: % (95% CI)      |
| <b>Delayed acute complications</b> |                             |                 |                        |                     |                        |                     |
| Myocarditis                        | 0/NR (0)                    | n < 5           | -                      | -                   | -                      | -                   |
| Heart failure                      | 5/8908 (0.06)               | 86/79893 (0.1)  | -0.05 (-0.11 to 0.00)  | 0.52 (0.21 to 1.28) | -0.04 (-0.10 to 0.01)  | 0.58 (0.23 to 1.43) |
| Venous thromboembolism             | 20/8785 (0.2)               | 110/78872 (0.1) | 0.09 (-0.01 to 0.19)   | 1.63 (1.01 to 2.63) | 0.10 (-0.00 to 0.20)   | 1.77 (1.09 to 2.86) |
| Peripheral vascular disease        | n < 5                       | 22/80232 (0.03) | NR                     | NR                  | NR                     | NR                  |
| Ischaemic stroke or TIA            | 12/8748 (0.1)               | 117/78411 (0.2) | -0.01 (-0.09 to 0.07)  | 0.92 (0.51 to 1.66) | 0.00 (-0.08 to 0.08)   | 1.00 (0.55 to 1.82) |
| Cerebral haemorrhage               | 0/8947 (0)                  | 22/80462 (0.03) | -                      | -                   | -                      | -                   |
| Guillain-Barré syndrome            | 0/8976 (0)                  | n < 5           | -                      | -                   | -                      | -                   |
| Encephalitis                       | 0/8975 (0)                  | n < 5           | -                      | -                   | -                      | -                   |
| Psychosis                          | n < 5                       | 43/80244 (0.05) | NR                     | NR                  | NR                     | NR                  |
| Kawasaki disease                   | 0/NR (0)                    | 0/80882 (0)     | -                      | -                   | -                      | -                   |
| PIMS                               | 0/8976 (0)                  | n < 5           | -                      | -                   | -                      | -                   |
| Acute kidney injury                | 58/8983 (0.7)               | 492/80894 (0.6) | 0.04 (-0.14 to 0.21)   | 1.06 (0.81 to 1.39) | 0.08 (-0.10 to 0.25)   | 1.13 (0.86 to 1.48) |
| <b>Chronic disease</b>             |                             |                 |                        |                     |                        |                     |
| Pulmonary disease                  | 22/8195 (0.3)               | 441/70721 (0.6) | -0.36 (-0.48 to -0.23) | 0.43 (0.28 to 0.66) | -0.33 (-0.46 to -0.20) | 0.45 (0.29 to 0.69) |
| Interstitial pulmonary fibrosis    | 0/8977 (0)                  | 11/80800 (0.01) | -                      | -                   | -                      | -                   |
| Cardiovascular disease             | 32/8146 (0.4)               | 328/71774 (0.5) | -0.06 (-0.21 to 0.08)  | 0.86 (0.60 to 1.23) | -0.04 (-0.18 to 0.11)  | 0.91 (0.63 to 1.31) |
| Diabetes mellitus                  | 9/8691 (0.1)                | 81/77928 (0.1)  | -0.00 (-0.07 to 0.07)  | 1.00 (0.50 to 1.98) | 0.01 (-0.07 to 0.08)   | 1.06 (0.53 to 2.13) |
| Neurological disease               | 33/8028 (0.4)               | 343/69664 (0.5) | -0.08 (-0.23 to 0.07)  | 0.83 (0.58 to 1.19) | -0.05 (-0.19 to 0.10)  | 0.90 (0.63 to 1.29) |
| Neuropathies                       | 11/8537 (0.1)               | 188/75365 (0.3) | -0.12 (-0.20 to -0.04) | 0.52 (0.28 to 0.95) | -0.11 (-0.19 to -0.02) | 0.55 (0.30 to 1.01) |
| Psychiatric illness                | 27/8586 (0.3)               | 429/74641 (0.6) | -0.26 (-0.39 to -0.13) | 0.55 (0.37 to 0.81) | -0.19 (-0.32 to -0.07) | 0.62 (0.42 to 0.91) |
| Depression                         | 9/8884 (0.1)                | 107/79616 (0.1) | -0.03 (-0.10 to 0.04)  | 0.75 (0.38 to 1.49) | -0.01 (-0.08 to 0.06)  | 0.91 (0.46 to 1.80) |
| Anxiety disorders                  | 15/8786 (0.2)               | 293/77654 (0.4) | -0.21 (-0.30 to -0.11) | 0.45 (0.27 to 0.76) | -0.15 (-0.24 to -0.05) | 0.54 (0.32 to 0.90) |
| <b>Persisting symptoms</b>         |                             |                 |                        |                     |                        |                     |
| Dyspnoea                           | 103/8676 (1.2)              | 499/76728 (0.7) | 0.54 (0.30 to 0.77)    | 1.83 (1.48 to 2.25) | 0.59 (0.36 to 0.83)    | 2.00 (1.62 to 2.48) |
| Cough                              | 17/8677 (0.2)               | 300/77596 (0.4) | -0.19 (-0.29 to -0.09) | 0.51 (0.31 to 0.83) | -0.19 (-0.30 to -0.09) | 0.50 (0.31 to 0.82) |
| Anosmia                            | n < 5                       | 0/80865 (0)     | -                      | -                   | -                      | -                   |
| Headache                           | 33/8400 (0.4)               | 299/73799 (0.4) | -0.01 (-0.15 to 0.13)  | 0.97 (0.68 to 1.39) | 0.04 (-0.10 to 0.18)   | 1.10 (0.77 to 1.58) |
| Fatigue related disorders          | 18/8809 (0.2)               | 175/78543 (0.2) | -0.02 (-0.12 to 0.08)  | 0.92 (0.56 to 1.49) | -0.01 (-0.11 to 0.09)  | 0.97 (0.60 to 1.59) |
| Nonspecific pain                   | 24/8438 (0.3)               | 301/74235 (0.4) | -0.12 (-0.24 to 0.00)  | 0.70 (0.46 to 1.06) | -0.06 (-0.19 to 0.06)  | 0.82 (0.54 to 1.24) |

RD = Risk difference, RR = Risk ratio, CI = Confidence interval, PS = Propensity score, TIA = transitory ischaemic attack, PIMS = Diagnoses related to paediatric inflammatory multisystemic syndrome, n < 5 = counts less than 5 cannot be reported due to Danish legislation, NR = not reported due to Danish Data protection laws

**Table S5. Rates of health care utilisation 6 months to 2 weeks before and 2 weeks to 6 months after a SARS-CoV-2 test.**

Rates are reported as the number of events per 1000 individuals during the baseline and follow up period.

| Outcome                               | Baseline period                                          |                                            |            | Follow up                                                |                                            |            | Rate ratio          | PERR (95% CI) |
|---------------------------------------|----------------------------------------------------------|--------------------------------------------|------------|----------------------------------------------------------|--------------------------------------------|------------|---------------------|---------------|
|                                       | Non-hospitalised SARS-CoV-2, events (n/1000 individuals) | Test-negative, events (n/1000 individuals) | Rate ratio | Non-hospitalised SARS-CoV-2, events (n/1000 individuals) | Test-negative, events (n/1000 individuals) | Rate ratio |                     |               |
| <b>All</b>                            |                                                          |                                            |            |                                                          |                                            |            |                     |               |
| GP                                    | 11025/8983 (1227)                                        | 130202/80894 (1610)                        | 0.76       | 14707/8983 (1637)                                        | 146657/80894 (1813)                        | 0.90       | 1.18 (1.15 to 1.22) |               |
| Outpatient<br>Emergency<br>department | 8411/8983 (936)                                          | 113974/80894 (1409)                        | 0.66       | 9851/8983 (1097)                                         | 121185/80894 (1498)                        | 0.73       | 1.10 (1.05 to 1.16) |               |
| Hospitalisation                       | 220/8983 (24)                                            | 2044/80894 (25)                            | 0.97       | 296/8983 (33)                                            | 2561/80894 (32)                            | 1.04       | 1.07 (0.88 to 1.30) |               |
|                                       | 463/8983 (52)                                            | 6576/80894 (81)                            | 0.63       | 547/8983 (61)                                            | 7791/80894 (96)                            | 0.63       | 1.00 (0.87 to 1.14) |               |
| <b>Age 0-17</b>                       |                                                          |                                            |            |                                                          |                                            |            |                     |               |
| GP                                    | 515/584 (882)                                            | 6287/5662 (1110)                           | 0.79       | 619/584 (1060)                                           | 7165/5662 (1265)                           | 0.84       | 1.05 (0.93 to 1.20) |               |
| Outpatient<br>Emergency<br>department | 313/584 (536)                                            | 4124/5662 (728)                            | 0.74       | 338/584 (579)                                            | 4208/5662 (743)                            | 0.78       | 1.06 (0.86 to 1.31) |               |
| Hospitalisation                       | 14/584 (24)                                              | 180/5662 (32)                              | 0.75       | 12/584 (21)                                              | 147/5662 (26)                              | 0.79       | 1.05 (0.42 to 2.61) |               |
|                                       | 9/584 (15)                                               | 245/5662 (43)                              | 0.36       | 15/584 (26)                                              | 199/5662 (35)                              | 0.73       | 2.05 (0.69 to 6.11) |               |
| <b>Age 18-34</b>                      |                                                          |                                            |            |                                                          |                                            |            |                     |               |
| GP                                    | 2927/2436 (1202)                                         | 34337/22045 (1558)                         | 0.77       | 3740/2436 (1535)                                         | 39493/22045 (1791)                         | 0.86       | 1.11 (1.05 to 1.18) |               |
| Outpatient<br>Emergency<br>department | 2146/2436 (881)                                          | 26541/22045 (1204)                         | 0.73       | 2744/2436 (1126)                                         | 28825/22045 (1308)                         | 0.86       | 1.18 (1.07 to 1.29) |               |
| Hospitalisation                       | 71/2436 (29)                                             | 555/22045 (25)                             | 1.16       | 76/2436 (31)                                             | 691/22045 (31)                             | 1.00       | 0.86 (0.59 to 1.26) |               |
|                                       | 90/2436 (37)                                             | 1306/22045 (59)                            | 0.62       | 131/2436 (54)                                            | 1762/22045 (80)                            | 0.67       | 1.08 (0.80 to 1.45) |               |
| <b>Age 35-54</b>                      |                                                          |                                            |            |                                                          |                                            |            |                     |               |
| GP                                    | 4077/3481 (1171)                                         | 47651/31004 (1537)                         | 0.76       | 5861/3481 (1684)                                         | 54712/31004 (1765)                         | 0.95       | 1.25 (1.20 to 1.31) |               |
| Outpatient<br>Emergency<br>department | 2714/3481 (780)                                          | 39436/31004 (1272)                         | 0.61       | 3472/3481 (997)                                          | 41061/31004 (1324)                         | 0.75       | 1.23 (1.12 to 1.34) |               |
| Hospitalisation                       | 76/3481 (22)                                             | 725/31004 (23)                             | 0.93       | 119/3481 (34)                                            | 932/31004 (30)                             | 1.14       | 1.22 (0.89 to 1.67) |               |
|                                       | 114/3481 (33)                                            | 1837/31004 (59)                            | 0.55       | 137/3481 (39)                                            | 2082/31004 (67)                            | 0.59       | 1.06 (0.78 to 1.44) |               |
| <b>Age 55-74</b>                      |                                                          |                                            |            |                                                          |                                            |            |                     |               |
| GP                                    | 2797/2014 (1389)                                         | 33417/18259 (1830)                         | 0.76       | 3532/2014 (1754)                                         | 35888/18259 (1965)                         | 0.89       | 1.18 (1.11 to 1.24) |               |
| Outpatient<br>Emergency<br>department | 2635/2014 (1308)                                         | 35408/18259 (1939)                         | 0.67       | 2679/2014 (1330)                                         | 38098/18259 (2087)                         | 0.64       | 0.94 (0.85 to 1.05) |               |
| Hospitalisation                       | 46/2014 (23)                                             | 462/18259 (25)                             | 0.90       | 76/2014 (38)                                             | 605/18259 (33)                             | 1.14       | 1.26 (0.88 to 1.82) |               |
|                                       | 125/2014 (62)                                            | 2104/18259 (115)                           | 0.54       | 140/2014 (70)                                            | 2448/18259 (134)                           | 0.52       | 0.96 (0.72 to 1.29) |               |
| <b>Age 75+</b>                        |                                                          |                                            |            |                                                          |                                            |            |                     |               |
| GP                                    | 709/468 (1515)                                           | 8510/3924 (2169)                           | 0.70       | 955/468 (2041)                                           | 9399/3924 (2395)                           | 0.85       | 1.22 (1.09 to 1.36) |               |

|                 |                |                  |      |                |                  |      |                     |
|-----------------|----------------|------------------|------|----------------|------------------|------|---------------------|
| Outpatient      | 603/468 (1288) | 8465/3924 (2157) | 0·60 | 618/468 (1321) | 8993/3924 (2292) | 0·58 | 0·96 (0·78 to 1·19) |
| Emergency       |                |                  |      |                |                  |      |                     |
| department      | 13/468 (28)    | 122/3924 (31)    | 0·89 | 13/468 (28)    | 186/3924 (47)    | 0·59 | 0·66 (0·25 to 1·71) |
| Hospitalisation | 125/468 (267)  | 1084/3924 (276)  | 0·97 | 124/468 (265)  | 1300/3924 (331)  | 0·80 | 0·83 (0·60 to 1·13) |



**Table S6. Number of reinitiators and risk estimates for drugs suspected to represent delayed complications of SARS-CoV-2 infection during the period 2 weeks to 6 months after a SARS-CoV-2 test.**

Reinitiation is defined as a new prescription for the drug of interest during follow-up among former users (individuals who have not redeemed a prescription for the drug of interest during the previous 12 months)

| Drug group                    | Non-hospitalised | Test-negative    | Comparison             |                     |
|-------------------------------|------------------|------------------|------------------------|---------------------|
|                               | SARS-CoV-2       |                  | Risk: n/N (%)          | RD: % (95% CI)      |
| Bronchodilating agents        | 92/1444 (6.4)    | 794/14428 (5.5)  | 0.87 (-0.45 to 2.18)   | 1.16 (0.94 to 1.43) |
| SABA                          | 90/1446 (6.2)    | 859/14863 (5.8)  | 0.44 (-0.86 to 1.75)   | 1.08 (0.87 to 1.33) |
| ICS                           | 40/756 (5.3)     | 454/8864 (5.1)   | 0.17 (-1.49 to 1.83)   | 1.03 (0.75 to 1.41) |
| Cough preparations            | 21/1254 (1.7)    | 184/13006 (1.4)  | 0.26 (-0.48 to 1.00)   | 1.18 (0.76 to 1.85) |
| Paracetamol                   | 253/1945 (13)    | 2464/19073 (13)  | 0.09 (-1.48 to 1.66)   | 1.01 (0.89 to 1.14) |
| NSAIDs                        | 322/4264 (7.6)   | 3271/40674 (8.0) | -0.49 (-1.33 to 0.35)  | 0.94 (0.84 to 1.05) |
| Opioids and opioid-like drugs | 76/2076 (3.7)    | 1244/22512 (5.5) | -1.87 (-2.73 to -1.00) | 0.66 (0.53 to 0.83) |
| Triptans                      | 20/475 (4.2)     | 198/5472 (3.6)   | 0.59 (-1.28 to 2.46)   | 1.16 (0.74 to 1.83) |
| Glucose lowering drugs        | 7/120 (5.8)      | 70/1230 (5.7)    | 0.14 (-4.25 to 4.53)   | 1.03 (0.48 to 2.18) |
| Antidepressants               | 29/1025 (2.8)    | 526/13378 (3.9)  | -1.10 (-2.17 to -0.04) | 0.72 (0.50 to 1.04) |
| Benzodiazapines and Z-drugs   | 40/1257 (3.2)    | 525/14802 (3.6)  | -0.36 (-1.38 to 0.65)  | 0.90 (0.65 to 1.23) |
| Antipsychotics                | 8/288 (2.8)      | 143/4186 (3.4)   | -0.64 (-2.61 to 1.34)  | 0.81 (0.40 to 1.64) |
| Platelet inhibitors           | 9/358 (2.5)      | 115/3602 (3.2)   | -0.68 (-2.40 to 1.04)  | 0.79 (0.40 to 1.54) |
| Anticoagulants                | n < 5            | 34/1180 (2.88)   |                        | NR                  |
| Antihypertensives             | 35/764 (4.6)     | 381/7772 (4.9)   | -0.32 (-1.88 to 1.24)  | 0.93 (0.67 to 1.31) |

RD = Risk difference, RR = Risk ratio, SABA = Short-acting beta-2 agonists, CI = Confidence interval, ICS = inhaled corticosteroids, NSAIDs = Non-steroidal anti-inflammatory drugs, n < 5 = counts less than 5 cannot be reported due to Danish Data protection laws, NR = not reported due to Danish Data protection laws

**Table S7. Number of readmissions and risk estimates for diagnoses suspected to represent delayed complications of SARS-CoV-2 infection during the period 2 weeks to 6 months after a SARS-CoV-2 test.**

Readmission is defined as a discharge diagnosis during follow-up among individuals with a history of the diagnosis of interest

| Diagnosis                          | Non-hospitalised | Test-negative   | Comparison             |                     |
|------------------------------------|------------------|-----------------|------------------------|---------------------|
|                                    | SARS-CoV-2       |                 | Risk: n/N (%)          | RD: % (95% CI)      |
| <b>Delayed acute complications</b> |                  |                 |                        |                     |
| Myocarditis                        | 0/NR (0)         | 0/52 (0)        | -                      | -                   |
| Heart failure                      | n < 5            | 95/1001 (9.5)   | NR                     | NR                  |
| Venous thromboembolism             | 7/198 (3.5)      | 53/2022 (2.6)   | 0.91 (-1.75 to 3.58)   | 1.35 (0.62 to 2.93) |
| Peripheral vascular disease        | n < 5            | 27/662 (4.1)    | NR                     | NR                  |
| Ischaemic stroke or TIA            | n < 5            | 54/2483 (2.2)   | NR                     | NR                  |
| Cerebral haemorrhage               | 0/36 (0)         | n < 5           | -                      | -                   |
| Guillain-Barré syndrome            | n < 5            | n < 5           | NR                     | NR                  |
| Encephalitis                       | 0/8 (0.00)       | n < 5           | -                      | -                   |
| Psychosis                          | 10/39 (25)       | 135/650 (21)    | 4.87 (-9.18 to 18.93)  | 1.23 (0.71 to 2.15) |
| Kawasaki disease                   | 0/NR (0)         | 0/12 (0)        | -                      | -                   |
| PIMS                               | 0/7 (0)          | 0/68 (0)        | -                      | -                   |
| <b>Chronic disease</b>             |                  |                 |                        |                     |
| Pulmonary disease                  | 51/788 (6.5)     | 878/10173 (8.6) | -2.16 (-3.96 to -0.36) | 0.75 (0.57 to 0.99) |
| Interstitial pulmonary fibrosis    | n < 5            | 14/94 (14.9)    | NR                     | NR                  |
| Cardiovascular disease             | 52/837 (6.2)     | 686/9120 (7.5)  | -1.31 (-3.03 to 0.41)  | 0.83 (0.63 to 1.09) |
| Diabetes mellitus                  | 75/292 (26)      | 648/2966 (22)   | 3.84 (-1.39 to 9.06)   | 1.18 (0.96 to 1.45) |
| Neurological disease               | 42/955 (4.4)     | 534/11230 (4.8) | -0.36 (-1.72 to 1.00)  | 0.92 (0.68 to 1.26) |
| Neuropathies                       | 13/446 (2.9)     | 137/5529 (2.5)  | 0.44 (-1.18 to 2.05)   | 1.18 (0.67 to 2.06) |
| Psychiatric illness                | 39/397 (9.8)     | 627/6253 (10.0) | -0.20 (-3.22 to 2.82)  | 0.98 (0.72 to 1.33) |
| Depression                         | n < 5            | 57/1278 (4.5)   | NR                     | NR                  |
| Anxiety disorders                  | 14/197 (7.1)     | 222/3240 (6.9)  | 0.25 (-3.44 to 3.95)   | 1.04 (0.62 to 1.75) |
| <b>Persisting symptoms</b>         |                  |                 |                        |                     |
| Dyspnoea                           | 7/307 (2.3)      | 195/4166 (4.7)  | -2.40 (-4.19 to -0.61) | 0.49 (0.23 to 1.03) |
| Cough                              | 6/306 (2.0)      | 83/3298 (2.5)   | -0.56 (-2.20 to 1.09)  | 0.78 (0.34 to 1.77) |
| Anosmia                            | 0/6 (0)          | n < 5           | -                      | -                   |
| Headache                           | 18/583 (3.1)     | 289/7095 (4.1)  | -0.99 (-2.46 to 0.49)  | 0.76 (0.47 to 1.21) |
| Fatigue related disorders          | n < 5            | 33/2351 (1.4)   | NR                     | NR                  |
| Nonspecific pain                   | 12/545 (2.2)     | 225/6659 (3.4)  | -1.18 (-2.48 to 0.13)  | 0.65 (0.37 to 1.16) |

RD = Risk difference, RR = Risk ratio, CI = Confidence interval, PS = Propensity score, TIA = transitory ischaemic attack, PIMS = Diagnoses related to paediatric inflammatory multisystemic syndrome, n < 5 = counts less than 5 cannot be reported due to Danish legislation, NR = not reported due to Danish Data protection laws

**Table S8. Hypothesis-free screening for increased risks of initiating a given drug 2 weeks to 6 months after SARS-CoV-2 infection**

Drugs are ranked according to the risk difference. The 50 highest ranked drugs are reported. Initiation was defined as the first ever prescription for a given drug

| Drug                                | ATC     | Non-hospitalised SARS-CoV-2 |                             | Comparison           |                     |
|-------------------------------------|---------|-----------------------------|-----------------------------|----------------------|---------------------|
|                                     |         | Risk: n/N (%)               | Test-negative Risk: n/N (%) | RD: % (95% CI)       | RR (95% CI)         |
| Salbutamol                          | R03AC02 | 112/7945 (1·41)             | 760/67594 (1·12)            | 0·29 (0·01 to 0·56)  | 1·25 (1·03 to 1·53) |
| Terbutaline                         | R03AC03 | 37/7797 (0·47)              | 213/66779 (0·32)            | 0·16 (-0·00 to 0·31) | 1·49 (1·05 to 2·11) |
| Ketoconazole                        | D01AC08 | 44/7707 (0·57)              | 315/69071 (0·46)            | 0·11 (-0·06 to 0·29) | 1·25 (0·91 to 1·71) |
| Miconazole                          | A01AB09 | 35/8501 (0·41)              | 230/75553 (0·30)            | 0·11 (-0·03 to 0·25) | 1·35 (0·95 to 1·93) |
| Fusidic acid                        | S01AA13 | 32/6324 (0·51)              | 222/54187 (0·41)            | 0·10 (-0·09 to 0·28) | 1·24 (0·85 to 1·79) |
| Sumatriptan                         | N02CC01 | 32/8415 (0·38)              | 206/74155 (0·28)            | 0·10 (-0·03 to 0·24) | 1·37 (0·94 to 1·99) |
| Hydroxocobalamin                    | B03BA03 | 10/8828 (0·11)              | 21/79064 (0·03)             | 0·09 (0·02 to 0·16)  | 4·26 (2·01 to 9·05) |
| Progesterone                        | G03DA04 | 15/8829 (0·17)              | 80/79108 (0·10)             | 0·07 (-0·02 to 0·16) | 1·68 (0·97 to 2·91) |
| Diazepam                            | N05BA01 | 11/8676 (0·13)              | 51/76913 (0·07)             | 0·06 (-0·02 to 0·14) | 1·91 (1·00 to 3·67) |
| Ganirelix                           | H01CC01 | 11/8890 (0·12)              | 52/79845 (0·07)             | 0·06 (-0·02 to 0·13) | 1·90 (0·99 to 3·64) |
| Hydrocortisone and antibiotics      | D07CA01 | 15/8595 (0·17)              | 99/76985 (0·13)             | 0·05 (-0·05 to 0·14) | 1·36 (0·79 to 2·33) |
| Tobramycin                          | S01AA12 | 15/8334 (0·18)              | 95/73751 (0·13)             | 0·05 (-0·04 to 0·15) | 1·40 (0·81 to 2·41) |
| Aciclovir                           | D06BB03 | 12/8684 (0·14)              | 67/77579 (0·09)             | 0·05 (-0·03 to 0·13) | 1·60 (0·87 to 2·96) |
| Follitropin alfa                    | G03GA05 | 11/8841 (0·12)              | 60/79226 (0·08)             | 0·05 (-0·03 to 0·12) | 1·64 (0·86 to 3·12) |
| Empagliflozin                       | A10BK03 | 11/8917 (0·12)              | 57/80428 (0·07)             | 0·05 (-0·02 to 0·13) | 1·74 (0·91 to 3·32) |
| Diclofenac                          | S01BC03 | 18/8823 (0·20)              | 127/78767 (0·16)            | 0·04 (-0·06 to 0·14) | 1·27 (0·77 to 2·07) |
| Isotretinoin                        | D10BA01 | 12/8667 (0·14)              | 74/78519 (0·09)             | 0·04 (-0·04 to 0·13) | 1·47 (0·80 to 2·70) |
| Docusate sodium, incl· combinations | A06AG10 | 11/8874 (0·12)              | 67/79849 (0·08)             | 0·04 (-0·04 to 0·12) | 1·48 (0·78 to 2·79) |
| Buprenorphine                       | N02AE01 | 12/8885 (0·14)              | 73/79653 (0·09)             | 0·04 (-0·04 to 0·12) | 1·47 (0·80 to 2·71) |
| Levocabastine                       | S01GX02 | 10/8646 (0·12)              | 60/77347 (0·08)             | 0·04 (-0·04 to 0·11) | 1·49 (0·76 to 2·91) |
| Imiquimod                           | D06BB10 | 7/8916 (0·08)               | 34/80213 (0·04)             | 0·04 (-0·02 to 0·10) | 1·85 (0·82 to 4·18) |
| Latanoprost                         | S01EE01 | 6/8904 (0·07)               | 25/80204 (0·03)             | 0·04 (-0·02 to 0·09) | 2·16 (0·89 to 5·27) |
| Buserelin                           | L02AE01 | 5/8912 (0·06)               | 14/80136 (0·02)             | 0·04 (-0·01 to 0·09) | 3·21 (1·16 to 8·91) |
| Valaciclovir                        | J05AB11 | 20/8716 (0·23)              | 157/78042 (0·20)            | 0·03 (-0·08 to 0·13) | 1·14 (0·72 to 1·82) |
| Sildenafil                          | G04BE03 | 19/8629 (0·22)              | 144/77336 (0·19)            | 0·03 (-0·07 to 0·14) | 1·18 (0·73 to 1·91) |
| Mupirocin                           | D06AX09 | 10/8668 (0·12)              | 67/77138 (0·09)             | 0·03 (-0·05 to 0·10) | 1·33 (0·68 to 2·58) |
| Laurilsulfate, incl· combinations   | A06AG11 | 10/8901 (0·11)              | 69/80024 (0·09)             | 0·03 (-0·05 to 0·10) | 1·30 (0·67 to 2·53) |
| Tadalafil                           | G04BE08 | 8/8815 (0·09)               | 51/79290 (0·06)             | 0·03 (-0·04 to 0·09) | 1·41 (0·67 to 2·97) |
| Rizatriptan                         | N02CC04 | 8/8835 (0·09)               | 44/79207 (0·06)             | 0·03 (-0·03 to 0·10) | 1·63 (0·77 to 3·46) |

|                                           |         |                |                  |                      |                     |
|-------------------------------------------|---------|----------------|------------------|----------------------|---------------------|
| Dapagliflozin                             | A10BK01 | 7/8952 (0·08)  | 35/80580 (0·04)  | 0·03 (-0·02 to 0·09) | 1·80 (0·80 to 4·05) |
| Dexamethasone and antiinfectives          | S03CA01 | 6/8680 (0·07)  | 28/77582 (0·04)  | 0·03 (-0·02 to 0·09) | 1·92 (0·79 to 4·62) |
| Benzoyl peroxide                          | D10AE01 | 5/8893 (0·06)  | 23/79957 (0·03)  | 0·03 (-0·02 to 0·08) | 1·95 (0·74 to 5·14) |
| Amorolfine                                | D01AE16 | 5/8875 (0·06)  | 24/79983 (0·03)  | 0·03 (-0·02 to 0·08) | 1·88 (0·72 to 4·92) |
| Desloratadine                             | R06AX27 | 31/8390 (0·37) | 257/74406 (0·35) | 0·02 (-0·11 to 0·16) | 1·07 (0·74 to 1·55) |
| Diclofenac                                | M02AA15 | 14/8858 (0·16) | 112/79485 (0·14) | 0·02 (-0·07 to 0·10) | 1·12 (0·64 to 1·95) |
| Adapalene, combinations                   | D10AD53 | 13/8717 (0·15) | 101/78605 (0·13) | 0·02 (-0·06 to 0·11) | 1·16 (0·65 to 2·07) |
| Clotrimazole                              | G01AF02 | 12/8529 (0·14) | 93/76111 (0·12)  | 0·02 (-0·06 to 0·10) | 1·15 (0·63 to 2·10) |
| Ramipril                                  | C09AA05 | 11/8802 (0·12) | 84/78091 (0·11)  | 0·02 (-0·06 to 0·09) | 1·16 (0·62 to 2·18) |
| Fluocinolone acetonide and antiinfectives | S02CA05 | 10/8894 (0·11) | 73/80069 (0·09)  | 0·02 (-0·05 to 0·09) | 1·23 (0·64 to 2·39) |
| Lymecycline                               | J01AA04 | 8/8654 (0·09)  | 60/77847 (0·08)  | 0·02 (-0·05 to 0·08) | 1·20 (0·57 to 2·51) |
| Zopiclone                                 | N05CF01 | 25/8138 (0·31) | 213/71017 (0·30) | 0·01 (-0·12 to 0·13) | 1·02 (0·68 to 1·55) |
| Levonorgestrel and ethinylestradiol       | G03AA07 | 21/7638 (0·27) | 179/67484 (0·27) | 0·01 (-0·11 to 0·13) | 1·04 (0·66 to 1·63) |
| Ferrous sulfate                           | B03AA07 | 17/8776 (0·19) | 146/78706 (0·19) | 0·01 (-0·09 to 0·10) | 1·04 (0·63 to 1·72) |
| Apixaban                                  | B01AF02 | 13/8888 (0·15) | 112/80004 (0·14) | 0·01 (-0·08 to 0·09) | 1·04 (0·59 to 1·85) |
| Choriogonadotropin alfa                   | G03GA08 | 11/8769 (0·13) | 90/78404 (0·11)  | 0·01 (-0·07 to 0·09) | 1·09 (0·58 to 2·04) |
| Clindamycin, combinations                 | D10AF51 | 10/8472 (0·12) | 83/76236 (0·11)  | 0·01 (-0·07 to 0·09) | 1·08 (0·56 to 2·09) |
| Methylphenidate                           | N06BA04 | 10/8865 (0·11) | 83/78725 (0·11)  | 0·01 (-0·07 to 0·08) | 1·07 (0·56 to 2·06) |
| Pivampicillin                             | J01CA02 | 9/8243 (0·11)  | 68/71633 (0·09)  | 0·01 (-0·06 to 0·09) | 1·15 (0·57 to 2·30) |
| Pimecrolimus                              | D11AH02 | 10/8773 (0·11) | 80/78877 (0·10)  | 0·01 (-0·06 to 0·09) | 1·12 (0·58 to 2·17) |
| Candesartan                               | C09CA06 | 8/8866 (0·09)  | 66/79502 (0·08)  | 0·01 (-0·06 to 0·07) | 1·09 (0·52 to 2·26) |
| Escitalopram                              | N06AB10 | 8/8732 (0·09)  | 61/77193 (0·08)  | 0·01 (-0·05 to 0·08) | 1·16 (0·56 to 2·42) |
| Hydroxyzine                               | N05BB01 | 7/8896 (0·08)  | 54/79909 (0·07)  | 0·01 (-0·05 to 0·07) | 1·16 (0·53 to 2·56) |
| Ketorolac                                 | S01BC05 | 6/8848 (0·07)  | 46/79893 (0·06)  | 0·01 (-0·05 to 0·07) | 1·18 (0·50 to 2·76) |
| Tars                                      | D05AA   | 5/8935 (0·06)  | 40/80533 (0·05)  | 0·01 (-0·05 to 0·06) | 1·13 (0·44 to 2·85) |
| Osmotically acting laxatives              | A06AD   | 6/8899 (0·07)  | 50/80313 (0·06)  | 0·01 (-0·05 to 0·06) | 1·08 (0·46 to 2·53) |
| Hydrocortisone                            | S01BA02 | 6/8973 (0·07)  | 44/80722 (0·05)  | 0·01 (-0·04 to 0·07) | 1·23 (0·52 to 2·88) |
| Adapalene                                 | D10AD03 | 5/8693 (0·06)  | 38/78348 (0·05)  | 0·01 (-0·04 to 0·06) | 1·19 (0·47 to 3·01) |
| Alfuzosin                                 | G04CA01 | 5/8863 (0·06)  | 38/79948 (0·05)  | 0·01 (-0·04 to 0·06) | 1·19 (0·47 to 3·01) |

RD = Risk difference, RR = Risk ratio, CI = Confidence interval, ATC = Anatomical Therapeutical Classification

**Table S9. Hypothesis-free screening for increased risks of receiving first hospital diagnoses 2 weeks to 6 months after a SARS-CoV-2 test.**  
Diagnoses are ranked according to the risk difference. The 50 highest ranked diagnoses are reported.

| Diagnosis                                                                                                                   | ICD-10 | Non-hospitalised SARS-CoV-2 | Test-negative     | Comparison           |                         |
|-----------------------------------------------------------------------------------------------------------------------------|--------|-----------------------------|-------------------|----------------------|-------------------------|
|                                                                                                                             |        | Risk: n/N (%)               | Risk: n/N (%)     | RD: % (95% CI)       | RR (95% CI)             |
| Viral infection of unspecified site                                                                                         | B34    | 161/6148 (2.62)             | 40/77662 (0.05)   | 2.57 (2.17 to 2.97)  | 50.84 (36.00 to 71.81)  |
| Other special examinations and investigations of persons without complaint or reported diagnosis                            | Z01    | 203/2673 (7.59)             | 1188/17630 (6.74) | 0.86 (-0.21 to 1.93) | 1.13 (0.98 to 1.30)     |
| Sequelae of other and unspecified infectious and parasitic diseases                                                         | B94    | NR                          | NR                | NR                   | 63.03 (28.56 to 139.11) |
| Abnormalities of breathing                                                                                                  | R06    | 98/8533 (1.15)              | 509/74841 (0.68)  | 0.47 (0.23 to 0.70)  | 1.69 (1.36 to 2.09)     |
| Pain in throat and chest                                                                                                    | R07    | 64/8445 (0.76)              | 389/74333 (0.52)  | 0.23 (0.04 to 0.43)  | 1.45 (1.11 to 1.88)     |
| Need for immunization against other single viral diseases                                                                   | Z25    | 18/8875 (0.20)              | 30/80450 (0.04)   | 0.17 (0.07 to 0.26)  | 5.44 (3.03 to 9.75)     |
| Maternal infectious and parasitic diseases classifiable elsewhere but complicating pregnancy, childbirth and the puerperium | O98    | 14/8961 (0.16)              | 7/80724 (0.01)    | 0.15 (0.07 to 0.23)  | 18.02 (7.27 to 44.63)   |
| Open wound of wrist and hand                                                                                                | S61    | 34/7060 (0.48)              | 210/63267 (0.33)  | 0.15 (-0.02 to 0.32) | 1.45 (1.01 to 2.08)     |
| Supervision of normal pregnancy                                                                                             | Z34    | 47/6591 (0.71)              | 333/57277 (0.58)  | 0.13 (-0.08 to 0.34) | 1.23 (0.90 to 1.66)     |
| Contact with and exposure to communicable diseases                                                                          | Z20    | 18/8344 (0.22)              | 84/77161 (0.11)   | 0.11 (0.00 to 0.21)  | 1.98 (1.19 to 3.30)     |
| Medical observation and evaluation for suspected diseases and conditions                                                    | Z03    | 109/2829 (3.85)             | 839/22445 (3.74)  | 0.11 (-0.64 to 0.87) | 1.03 (0.85 to 1.25)     |
| Open wound of head                                                                                                          | S01    | 23/7526 (0.31)              | 150/67735 (0.22)  | 0.08 (-0.05 to 0.21) | 1.38 (0.89 to 2.14)     |
| Cystitis                                                                                                                    | N30    | 33/8420 (0.39)              | 239/75408 (0.32)  | 0.07 (-0.06 to 0.21) | 1.24 (0.86 to 1.78)     |
| Other headache syndromes                                                                                                    | G44    | 16/8820 (0.18)              | 88/78649 (0.11)   | 0.07 (-0.02 to 0.16) | 1.62 (0.95 to 2.76)     |
| Other abnormal products of conception                                                                                       | O02    | 13/8626 (0.15)              | 61/77352 (0.08)   | 0.07 (-0.01 to 0.16) | 1.91 (1.05 to 3.48)     |
| Postpartum care and examination                                                                                             | Z39    | 29/6834 (0.42)              | 222/60927 (0.36)  | 0.06 (-0.10 to 0.22) | 1.16 (0.79 to 1.71)     |
| Erysipelas                                                                                                                  | A46    | 14/8853 (0.16)              | 79/79626 (0.10)   | 0.06 (-0.03 to 0.14) | 1.59 (0.90 to 2.81)     |
| Orchitis and epididymitis                                                                                                   | N45    | 7/8927 (0.08)               | 16/80244 (0.02)   | 0.06 (-0.00 to 0.12) | 3.93 (1.62 to 9.56)     |
| Sexual dysfunction, not caused by organic disorder or disease                                                               | F52    | 6/8961 (0.07)               | 10/80620 (0.01)   | 0.05 (0.00 to 0.11)  | 5.40 (1.96 to 14.85)    |
| Postpartum haemorrhage                                                                                                      | O72    | 39/7923 (0.49)              | 309/69898 (0.44)  | 0.05 (-0.11 to 0.21) | 1.11 (0.80 to 1.55)     |
| Abnormalities of heart beat                                                                                                 | R00    | 19/8796 (0.22)              | 130/78636 (0.17)  | 0.05 (-0.05 to 0.15) | 1.31 (0.81 to 2.11)     |
| Pulmonary embolism                                                                                                          | I26    | 10/8914 (0.11)              | 49/80246 (0.06)   | 0.05 (-0.02 to 0.12) | 1.84 (0.93 to 3.63)     |
| Other venous embolism and thrombosis                                                                                        | I82    | 7/8948 (0.08)               | 20/80554 (0.02)   | 0.05 (-0.01 to 0.11) | 3.15 (1.33 to 7.45)     |
| Disturbances of smell and taste                                                                                             | R43    | 5/8973 (0.06)               | 7/80837 (0.01)    | 0.05 (-0.00 to 0.10) | 6.43 (2.04 to 20.27)    |
| Care involving use of rehabilitation procedures                                                                             | Z50    | 47/8246 (0.57)              | 386/72521 (0.53)  | 0.04 (-0.13 to 0.21) | 1.07 (0.79 to 1.45)     |
| Single spontaneous delivery                                                                                                 | O80    | 28/7128 (0.39)              | 222/63200 (0.35)  | 0.04 (-0.11 to 0.19) | 1.12 (0.76 to 1.66)     |
| Perineal laceration during delivery                                                                                         | O70    | 30/7902 (0.38)              | 237/69581 (0.34)  | 0.04 (-0.10 to 0.18) | 1.11 (0.76 to 1.63)     |
| Haemorrhoids and perinal venous thrombosis                                                                                  | K64    | 19/8861 (0.21)              | 140/79029 (0.18)  | 0.04 (-0.06 to 0.14) | 1.21 (0.75 to 1.95)     |

|                                                                                     |     |                |                  |                      |                      |
|-------------------------------------------------------------------------------------|-----|----------------|------------------|----------------------|----------------------|
| Senile cataract                                                                     | H25 | 14/8664 (0.16) | 97/78100 (0.12)  | 0.04 (-0.05 to 0.13) | 1.30 (0.74 to 2.28)  |
| Rash and other nonspecific skin eruption                                            | R21 | 10/8932 (0.11) | 58/80322 (0.07)  | 0.04 (-0.03 to 0.11) | 1.55 (0.79 to 3.03)  |
| Conjunctivitis                                                                      | H10 | 8/8646 (0.09)  | 41/77974 (0.05)  | 0.04 (-0.03 to 0.11) | 1.76 (0.83 to 3.75)  |
| Other injuries of lower limb, level unspecified                                     | T13 | 7/8950 (0.08)  | 29/80523 (0.04)  | 0.04 (-0.02 to 0.10) | 2.17 (0.95 to 4.96)  |
| Ectopic pregnancy                                                                   | O00 | 5/8898 (0.06)  | 9/79949 (0.01)   | 0.04 (-0.00 to 0.09) | 4.99 (1.67 to 14.89) |
| Special screening examination for other diseases and disorders                      | Z13 | 15/8085 (0.19) | 112/71873 (0.16) | 0.03 (-0.07 to 0.13) | 1.19 (0.69 to 2.04)  |
| Superficial injury of forearm                                                       | S50 | 11/8347 (0.13) | 74/73550 (0.10)  | 0.03 (-0.05 to 0.11) | 1.31 (0.70 to 2.47)  |
| Superficial injury of hip and thigh                                                 | S70 | 9/8704 (0.10)  | 59/77837 (0.08)  | 0.03 (-0.04 to 0.10) | 1.36 (0.68 to 2.75)  |
| Other retinal disorders                                                             | H35 | 7/8862 (0.08)  | 41/79710 (0.05)  | 0.03 (-0.03 to 0.09) | 1.54 (0.69 to 3.42)  |
| Abnormal involuntary movements                                                      | R25 | 7/8934 (0.08)  | 40/80148 (0.05)  | 0.03 (-0.03 to 0.09) | 1.57 (0.70 to 3.50)  |
| Open wound of forearm                                                               | S51 | 7/8735 (0.08)  | 39/78494 (0.05)  | 0.03 (-0.03 to 0.09) | 1.61 (0.72 to 3.60)  |
| Follow-up care involving plastic surgery                                            | Z42 | 8/8895 (0.09)  | 48/79982 (0.06)  | 0.03 (-0.03 to 0.09) | 1.50 (0.71 to 3.17)  |
| Fracture of skull and facial bones                                                  | S02 | 7/8692 (0.08)  | 38/77980 (0.05)  | 0.03 (-0.03 to 0.09) | 1.65 (0.74 to 3.70)  |
| Procedures for purposes other than remedying health state                           | Z41 | 6/8894 (0.07)  | 33/79775 (0.04)  | 0.03 (-0.03 to 0.08) | 1.63 (0.68 to 3.89)  |
| Delirium, not induced by alcohol and other psychoactive substances                  | F05 | 6/8955 (0.07)  | 32/80701 (0.04)  | 0.03 (-0.03 to 0.08) | 1.69 (0.71 to 4.04)  |
| Other diseases of digestive system                                                  | K92 | 6/8922 (0.07)  | 29/79981 (0.04)  | 0.03 (-0.02 to 0.09) | 1.85 (0.77 to 4.47)  |
| Need for immunization against certain single viral diseases                         | Z24 | 5/8667 (0.06)  | 24/79113 (0.03)  | 0.03 (-0.02 to 0.08) | 1.90 (0.73 to 4.98)  |
| Other disorders of brain                                                            | G93 | 5/8970 (0.06)  | 21/80628 (0.03)  | 0.03 (-0.02 to 0.08) | 2.14 (0.81 to 5.67)  |
| Aortic aneurysm and dissection                                                      | I71 | 5/8964 (0.06)  | 22/80578 (0.03)  | 0.03 (-0.02 to 0.08) | 2.04 (0.77 to 5.39)  |
| Follow-up examination after treatment for conditions other than malignant neoplasms | Z09 | 51/7319 (0.70) | 413/61280 (0.67) | 0.02 (-0.18 to 0.22) | 1.03 (0.77 to 1.38)  |
| Dislocation, sprain and strain of joints and ligaments at ankle and foot level      | S93 | 28/7174 (0.39) | 229/62335 (0.37) | 0.02 (-0.13 to 0.17) | 1.06 (0.72 to 1.57)  |
| Other orthopaedic follow-up care                                                    | Z47 | 22/8111 (0.27) | 184/73388 (0.25) | 0.02 (-0.10 to 0.14) | 1.08 (0.70 to 1.68)  |
| Gonarthrosis [arthrosis of knee]                                                    | M17 | 15/8613 (0.17) | 120/77061 (0.16) | 0.02 (-0.07 to 0.11) | 1.12 (0.65 to 1.91)  |
| Other local infections of skin and subcutaneous tissue                              | L08 | 8/8750 (0.09)  | 56/78776 (0.07)  | 0.02 (-0.05 to 0.09) | 1.29 (0.61 to 2.70)  |
| Family history of certain disabilities and chronic diseases leading to disablement  | Z82 | 7/8921 (0.08)  | 49/80075 (0.06)  | 0.02 (-0.04 to 0.08) | 1.28 (0.58 to 2.83)  |
| Malignant neoplasm of breast                                                        | C50 | 5/8868 (0.06)  | 33/79823 (0.04)  | 0.02 (-0.04 to 0.07) | 1.36 (0.53 to 3.49)  |
| Other abnormal findings of blood chemistry                                          | R79 | 5/8947 (0.06)  | 26/80529 (0.03)  | 0.02 (-0.03 to 0.07) | 1.73 (0.66 to 4.51)  |
| Family history of other specific disorders                                          | Z83 | 5/8958 (0.06)  | 29/80535 (0.04)  | 0.02 (-0.03 to 0.07) | 1.55 (0.60 to 4.00)  |
| Diseases of vocal cords and larynx, not elsewhere classified                        | J38 | 5/8931 (0.06)  | 30/80186 (0.04)  | 0.02 (-0.03 to 0.07) | 1.50 (0.58 to 3.86)  |
| Dislocation, sprain and strain of joints and ligaments of knee                      | S83 | 16/7944 (0.20) | 134/70243 (0.19) | 0.01 (-0.09 to 0.11) | 1.06 (0.63 to 1.77)  |
| Superficial injury of head                                                          | S00 | 11/7958 (0.14) | 90/70814 (0.13)  | 0.01 (-0.07 to 0.10) | 1.09 (0.58 to 2.03)  |
| Synovitis and tenosynovitis                                                         | M65 | 10/8675 (0.12) | 84/77385 (0.11)  | 0.01 (-0.07 to 0.08) | 1.06 (0.55 to 2.04)  |
| Cerebral infarction                                                                 | I63 | 9/8868 (0.10)  | 76/79663 (0.10)  | 0.01 (-0.06 to 0.08) | 1.06 (0.53 to 2.12)  |
| Other disorders of breast                                                           | N64 | 9/8804 (0.10)  | 71/78975 (0.09)  | 0.01 (-0.06 to 0.08) | 1.14 (0.57 to 2.27)  |

|                                                                      |     |               |                 |                      |                     |
|----------------------------------------------------------------------|-----|---------------|-----------------|----------------------|---------------------|
| Chronic ischaemic heart disease                                      | I25 | 7/8805 (0·08) | 58/78875 (0·07) | 0·01 (-0·06 to 0·07) | 1·08 (0·49 to 2·37) |
| Sequelae of injuries of upper limb                                   | T92 | 8/8723 (0·09) | 67/77924 (0·09) | 0·01 (-0·06 to 0·07) | 1·07 (0·51 to 2·22) |
| Unspecified haematuria                                               | R31 | 8/8703 (0·09) | 62/78048 (0·08) | 0·01 (-0·05 to 0·08) | 1·16 (0·55 to 2·42) |
| Benign lipomatous neoplasm                                           | D17 | 8/8804 (0·09) | 61/79321 (0·08) | 0·01 (-0·05 to 0·08) | 1·18 (0·57 to 2·47) |
| Inguinal hernia                                                      | K40 | 8/8691 (0·09) | 62/78354 (0·08) | 0·01 (-0·05 to 0·08) | 1·16 (0·56 to 2·43) |
| Cervical disc disorders                                              | M50 | 6/8839 (0·07) | 46/79084 (0·06) | 0·01 (-0·05 to 0·07) | 1·17 (0·50 to 2·73) |
| Disturbances of skin sensation                                       | R20 | 6/8930 (0·07) | 46/80124 (0·06) | 0·01 (-0·05 to 0·07) | 1·17 (0·50 to 2·74) |
| Dislocation, sprain and strain of joints and ligaments at neck level | S13 | 6/8587 (0·07) | 49/76059 (0·06) | 0·01 (-0·05 to 0·06) | 1·08 (0·46 to 2·53) |
| False labour                                                         | O47 | 5/8766 (0·06) | 40/78382 (0·05) | 0·01 (-0·05 to 0·06) | 1·12 (0·44 to 2·83) |
| Premature rupture of membranes                                       | O42 | 5/8717 (0·06) | 39/78162 (0·05) | 0·01 (-0·05 to 0·06) | 1·15 (0·45 to 2·92) |
| Oedema, not elsewhere classified                                     | R60 | 6/8934 (0·07) | 42/80401 (0·05) | 0·01 (-0·04 to 0·07) | 1·29 (0·55 to 3·02) |
| Complications following abortion and ectopic and molar pregnancy     | O08 | 5/8867 (0·06) | 36/79579 (0·05) | 0·01 (-0·04 to 0·06) | 1·25 (0·49 to 3·18) |

RD = Risk difference, RR = Risk ratio, CI = Confidence interval, ICD-10: International classification of diseases and related health problems 10<sup>th</sup> revision, NR = Not reported due to Danish data protection laws



**Table S10. Baseline characteristics of individuals with non-hospitalised SARS-CoV-2 infection and individuals hospitalised with SARS-CoV-2 infection.**

|                                    | <b>Non-hospitalised</b><br>N = 8,983 | <b>Hospitalised</b><br>N = 1,310 |
|------------------------------------|--------------------------------------|----------------------------------|
| <b>Demographics</b>                |                                      |                                  |
| Age, median (IQR)                  | 43 (30-56)                           | 64 (52-76)                       |
| Age < 18                           | 584 (6.5)                            | 7 (0.5)                          |
| Female sex                         | 5,471 (60.9)                         | 657 (50.2)                       |
| <b>Prescription drug use*</b>      |                                      |                                  |
| Bronchodilating agents             | 757 (8.4)                            | 239 (18.2)                       |
| ICS                                | 531 (5.9)                            | 152 (11.6)                       |
| Paracetamol                        | 2,257 (25.1)                         | 676 (51.6)                       |
| NSAIDs                             | 1,485 (16.5)                         | 288 (22.0)                       |
| Opioids and opioid-like drugs      | 591 (6.6)                            | 238 (18.2)                       |
| Antidepressants                    | 634 (7.1)                            | 211 (16.1)                       |
| Benzodiazapines and Z-drugs        | 362 (4.0)                            | 173 (13.2)                       |
| Antipsychotics                     | 168 (1.9)                            | 60 (4.6)                         |
| Platelet inhibitors                | 396 (4.4)                            | 244 (18.6)                       |
| Anticoagulants                     | 214 (2.4)                            | 196 (15.0)                       |
| Loop diuretics                     | 171 (1.9)                            | 176 (13.4)                       |
| <b>Lifestyle related diagnoses</b> |                                      |                                  |
| Obesity                            | 682 (7.6)                            | 160 (12.2)                       |
| Markers of smoking                 | 246 (2.7)                            | 135 (10.3)                       |
| Alcohol related disorders          | 184 (2.0)                            | 49 (3.7)                         |
| <b>Mental health</b>               |                                      |                                  |
| Depression                         | 99 (1.1)                             | 38 (2.9)                         |
| Anxiety disorders                  | 197 (2.2)                            | 48 (3.7)                         |
| Psychosis                          | 39 (0.4)                             | 6 (0.5)                          |
| <b>Frailty-related diagnoses</b>   |                                      |                                  |
| Cancer                             | 398 (4.4)                            | 168 (12.8)                       |
| Dementia                           | 69 (0.8)                             | 29 (2.2)                         |
| <b>Chronic conditions</b>          |                                      |                                  |
| Diabetes mellitus†                 | 526 (5.9)                            | 231 (17.6)                       |
| Hypertension†                      | 2,127 (23.7)                         | 753 (57.5)                       |
| Cardiovascular diseases            | 837 (9.3)                            | 427 (32.6)                       |
| Peripheral vascular disease        | 44 (0.5)                             | 22 (1.7)                         |
| Pulmonary disease                  | 788 (8.8)                            | 318 (24.3)                       |
| Kidney disease**                   | 49 (0.5)                             | 44 (3.4)                         |

\* = Defined as having redeemed a prescription during the year prior to start of follow up

† = Defined as having redeemed a prescription for a drug used to treat this condition

\*\* = Defined as having received a kidney disease related hospital diagnosis

IQR = interquartile range, SMD = standardized mean difference, SABA = Short-acting beta-2 agonists, ICS = inhaled corticosteroids, NSAIDs = Non-steroidal anti-inflammatory drugs, NA = Not applicable as counts less than 5 cannot be reported due to Danish legislation

**Table S11. Number of initiators and risks for drugs suspected to represent delayed complications of SARS-CoV-2 infection during the period 2 weeks to 6 months after a positive SARS-CoV-2 test.**

Community-managed individuals compared to hospitalised individuals with SARS-CoV-2 infection. Initiation was defined as the first ever prescription for a given drug

| <b>Drug group</b>             | <b>Non-hospitalised<br/>Risk: n/N (%)</b> | <b>Hospitalised<br/>Risk: n/N (%)</b> | <b>RD: % (95% CI)</b>  | <b>RR (95% CI)</b>  |
|-------------------------------|-------------------------------------------|---------------------------------------|------------------------|---------------------|
| Bronchodilating agents        | 121/6782 (1.78)                           | 26/861 (3.02)                         | -1.24 (-2.42 to -0.05) | 0.59 (0.39 to 0.90) |
| SABA                          | 117/6935 (1.69)                           | 24/911 (2.63)                         | -0.95 (-2.03 to 0.14)  | 0.64 (0.42 to 0.99) |
| ICS                           | 57/7696 (0.74)                            | 20/1029 (1.94)                        | -1.20 (-2.07 to -0.34) | 0.38 (0.23 to 0.63) |
| Cough preparations            | 28/7456 (0.38)                            | 10/943 (1.06)                         | -0.68 (-1.35 to -0.02) | 0.35 (0.17 to 0.73) |
| Paracetamol                   | 153/4781 (3.20)                           | 22/353 (6.23)                         | -3.03 (-5.60 to -0.46) | 0.51 (0.33 to 0.79) |
| NSAIDs                        | 83/3234 (2.57)                            | 5/269 (1.86)                          | 0.71 (-1.00 to 2.41)   | 1.38 (0.56 to 3.38) |
| Opioids and opioid-like drugs | 72/6316 (1.14)                            | 17/615 (2.76)                         | -1.62 (-2.95 to -0.30) | 0.41 (0.24 to 0.70) |
| Triptans                      | 33/8292 (0.40)                            | n < 5                                 | NR                     | NR                  |
| Glucose lowering drugs        | 23/8457 (0.27)                            | 15/1079 (1.39)                        | -1.12 (-1.83 to -0.41) | 0.20 (0.10 to 0.37) |
| Antidepressants               | 47/7324 (0.64)                            | 12/887 (1.35)                         | -0.71 (-1.49 to 0.07)  | 0.47 (0.25 to 0.89) |
| Benzodiazapines and Z-drugs   | 42/7364 (0.57)                            | 16/844 (1.90)                         | -1.33 (-2.26 to -0.39) | 0.30 (0.17 to 0.53) |
| Antipsychotics                | 24/8527 (0.28)                            | 14/1187 (1.18)                        | -0.90 (-1.52 to -0.27) | 0.24 (0.12 to 0.46) |
| Platelet inhibitors           | 28/8229 (0.34)                            | 10/890 (1.12)                         | -0.78 (-1.49 to -0.08) | 0.30 (0.15 to 0.62) |
| Anticoagulants                | 23/8659 (0.27)                            | 10/1063 (0.94)                        | -0.68 (-1.27 to -0.08) | 0.28 (0.13 to 0.59) |
| Antihypertensives             | 58/6856 (0.85)                            | 10/557 (1.80)                         | -0.95 (-2.07 to 0.17)  | 0.47 (0.24 to 0.92) |

RD = Risk difference, RR = Risk ratio, SABA = Short-acting beta-2 agonists, ICS = inhaled corticosteroids, NSAIDs = Non-steroidal anti-inflammatory drugs, PS = Propensity score, CI = Confidence interval

**Table S12. Number of first-ever diagnoses and risks for diagnoses suspected to represent delayed complications of SARS-CoV-2 infection during the period 2 weeks to 6 months after a SARS-CoV-2 test.**

Community-managed individuals compared to hospitalised individuals with SARS-CoV-2 infection.

| Diagnosis                          | Non-hospitalised<br>SARS-CoV-2 | Hospitalised<br>SARS-CoV-2 | Comparison             |                     |
|------------------------------------|--------------------------------|----------------------------|------------------------|---------------------|
|                                    | Risk: n/N (%)                  | Risk: n/N (%)              | RD: % (95% CI)         | RR (95% CI)         |
| <b>Delayed acute complications</b> |                                |                            |                        |                     |
| Myocarditis                        | 0/NR (0)                       | 0/NR (0)                   | -                      | -                   |
| Heart failure                      | 5/8908 (0.06)                  | n < 5                      | NR                     | NR                  |
| Venous thromboembolism             | 20/8785 (0.2)                  | 11/1190 (0.9)              | -0.70 (-1.25 to -0.14) | 0.25 (0.12 to 0.51) |
| Peripheral vascular disease        | n < 5                          | 0/1288 (0)                 | -                      | -                   |
| Ischaemic stroke or TIA            | 12/8748 (0.1)                  | 10/1175 (0.9)              | -0.71 (-1.24 to -0.18) | 0.16 (0.07 to 0.37) |
| Cerebral haemorrhage               | 0/8947 (0)                     | n < 5                      | -                      | -                   |
| Guillain-Barré syndrome            | 0/8976 (0)                     | 0/NR (0)                   | -                      | -                   |
| Encephalitis                       | 0/8975 (0)                     | 0/NR (0)                   | -                      | -                   |
| Psychosis                          | n < 5                          | n < 5                      | NR                     | NR                  |
| Kawasaki disease                   | 0/NR (0)                       | 0/1310 (0)                 | -                      | -                   |
| PIMS                               | 0/8976 (0)                     | 0/NR (0)                   | -                      | -                   |
| <b>Chronic disease</b>             |                                |                            |                        |                     |
| Pulmonary disease                  | 22/8195 (0.3)                  | 28/992 (2.8)               | -2.55 (-3.59 to -1.52) | 0.10 (0.05 to 0.17) |
| Interstitial pulmonary fibrosis    | 0/8977 (0)                     | n < 5                      | -                      | -                   |
| Cardiovascular disease             | 32/8146 (0.4)                  | 23/883 (2.6)               | -2.21 (-3.27 to -1.15) | 0.15 (0.09 to 0.26) |
| Diabetes mellitus                  | 9/8691 (0.1)                   | n < 5                      | NR                     | NR                  |
| Neurological disease               | 33/8028 (0.4)                  | 19/1058 (1.8)              | -1.38 (-2.20 to -0.57) | 0.23 (0.13 to 0.40) |
| Neuropathies                       | 11/8537 (0.1)                  | 12/1182 (1.0)              | -0.89 (-1.46 to -0.31) | 0.13 (0.06 to 0.29) |
| Psychiatric illness                | 27/8586 (0.3)                  | 6/1202 (0.5)               | -0.18 (-0.60 to 0.23)  | 0.63 (0.26 to 1.52) |
| Depression                         | 9/8884 (0.1)                   | 0/1272 (0)                 | -                      | -                   |
| Anxiety disorders                  | 15/8786 (0.2)                  | n < 5                      | NR                     | NR                  |
| <b>Persisting symptoms</b>         |                                |                            |                        |                     |
| Dyspnoea                           | 103/8676 (1.2)                 | 37/1140 (3.3)              | -2.06 (-3.11 to -1.00) | 0.37 (0.25 to 0.53) |
| Cough                              | 17/8677 (0.2)                  | n < 5                      | NR                     | NR                  |
| Anosmia                            | n < 5                          | n < 5                      | NR                     | NR                  |
| Headache                           | 33/8400 (0.4)                  | 5/1177 (0.4)               | -0.03 (-0.43 to 0.36)  | 0.92 (0.36 to 2.36) |
| Fatigue related disorders          | 18/8809 (0.2)                  | 15/1251 (1.2)              | -0.99 (-1.61 to -0.38) | 0.17 (0.09 to 0.34) |
| Nonspecific pain                   | 24/8438 (0.3)                  | 7/1181 (0.6)               | -0.31 (-0.76 to 0.14)  | 0.48 (0.21 to 1.11) |

RD = Risk difference, RR = Risk ratio, CI = Confidence interval, PS = Propensity score, TIA = transitory ischaemic attack, PIMS = Diagnoses related to paediatric inflammatory multisystemic syndrome, n < 5 = counts less than 5 cannot be reported due to Danish legislation, NR = not reported due to Danish data protection laws

**Table S13. Number of events, risks, risk differences and risk ratios for the initiation of drug groups potentially representing post-acute effects of SARS-CoV-2 infection during the period 2 weeks to 14 weeks after a SARS-CoV-2 test.**

| Drug group                    | Non-hospitalised            | Test-negative   | Unweighted             |                     | PS weighted            |                     |
|-------------------------------|-----------------------------|-----------------|------------------------|---------------------|------------------------|---------------------|
|                               | SARS-CoV-2<br>Risk: n/N (%) |                 | Risk: n/N (%)          | RD: % (95% CI)      | RR (95% CI)            | RD: % (95% CI)      |
| Bronchodilating agents        | 80/6782 (1.2)               | 621/55482 (1.1) | 0.06 (-0.21 to 0.33)   | 1.05 (0.84 to 1.33) | 0.05 (-0.22 to 0.32)   | 1.04 (0.83 to 1.32) |
| SABA                          | 79/6935 (1.1)               | 576/57206 (1.0) | 0.13 (-0.13 to 0.40)   | 1.13 (0.90 to 1.43) | 0.12 (-0.14 to 0.39)   | 1.12 (0.88 to 1.42) |
| ICS                           | 33/7696 (0.4)               | 534/64870 (0.8) | -0.39 (-0.56 to -0.23) | 0.52 (0.37 to 0.74) | -0.41 (-0.57 to -0.24) | 0.51 (0.36 to 0.73) |
| Cough preparations            | 18/7456 (0.2)               | 169/64857 (0.3) | -0.02 (-0.14 to 0.10)  | 0.93 (0.57 to 1.51) | -0.01 (-0.13 to 0.11)  | 0.97 (0.60 to 1.59) |
| Paracetamol                   | 80/4781 (1.7)               | 803/39052 (2.1) | -0.38 (-0.77 to 0.01)  | 0.81 (0.65 to 1.02) | -0.37 (-0.76 to 0.02)  | 0.82 (0.65 to 1.03) |
| NSAIDs                        | 38/3234 (1.2)               | 397/24688 (1.6) | -0.43 (-0.84 to -0.03) | 0.73 (0.52 to 1.02) | -0.44 (-0.84 to -0.03) | 0.73 (0.52 to 1.02) |
| Opioids and opioid-like drugs | 37/6316 (0.6)               | 407/51042 (0.8) | -0.21 (-0.41 to -0.01) | 0.73 (0.53 to 1.03) | -0.21 (-0.42 to -0.01) | 0.74 (0.53 to 1.03) |
| Triptans                      | 12/8292 (0.1)               | 104/72828 (0.1) | 0.00 (-0.08 to 0.09)   | 1.01 (0.56 to 1.84) | 0.01 (-0.08 to 0.09)   | 1.06 (0.58 to 1.93) |
| Glucose lowering drugs        | 14/8457 (0.2)               | 128/75984 (0.2) | -0.00 (-0.09 to 0.09)  | 0.98 (0.57 to 1.71) | 0.02 (-0.07 to 0.11)   | 1.12 (0.64 to 1.96) |
| Antidepressants               | 27/7324 (0.4)               | 256/58620 (0.4) | -0.07 (-0.22 to 0.08)  | 0.84 (0.57 to 1.25) | -0.04 (-0.19 to 0.11)  | 0.90 (0.60 to 1.34) |
| Benzodiazapines and Z-drugs   | 22/7364 (0.3)               | 206/61354 (0.3) | -0.04 (-0.17 to 0.10)  | 0.89 (0.57 to 1.38) | -0.01 (-0.15 to 0.12)  | 0.95 (0.61 to 1.48) |
| Antipsychotics                | 16/8527 (0.2)               | 148/74255 (0.2) | -0.01 (-0.11 to 0.09)  | 0.94 (0.56 to 1.58) | 0.03 (-0.07 to 0.12)   | 1.16 (0.69 to 1.96) |
| Platelet inhibitors           | 11/8229 (0.1)               | 160/72700 (0.2) | -0.09 (-0.17 to -0.00) | 0.61 (0.33 to 1.12) | -0.08 (-0.17 to 0.01)  | 0.63 (0.34 to 1.16) |
| Anticoagulants                | 16/8659 (0.2)               | 115/77469 (0.2) | 0.04 (-0.06 to 0.13)   | 1.24 (0.74 to 2.10) | 0.03 (-0.06 to 0.13)   | 1.21 (0.72 to 2.05) |
| Antihypertensives             | 31/6856 (0.5)               | 300/59086 (0.5) | -0.06 (-0.22 to 0.11)  | 0.89 (0.62 to 1.29) | -0.05 (-0.22 to 0.12)  | 0.90 (0.62 to 1.31) |

RD = Risk difference, RR = Risk ratio, SABA = Short-acting beta-2 agonists, ICS = inhaled corticosteroids, NSAIDs = Non-steroidal anti-inflammatory drugs, PS = Propensity score, CI = Confidence interval

**Table S14. Number of events, risks, risk differences and risk ratios for hospital diagnoses potentially representing post-acute effects of SARS-CoV-2 infection during the period 2 weeks to 14 weeks after a SARS-CoV-2 test.**

| Diagnosis                          | Non-hospitalised | Test-negative    | Unweighted             |                     | PS weighted            |                     |
|------------------------------------|------------------|------------------|------------------------|---------------------|------------------------|---------------------|
|                                    | Risk: n/N (%)    | Risk: n/N (%)    | RD: % (95% CI)         | RR (95% CI)         | RD: % (95% CI)         | RR (95% CI)         |
| <b>Delayed acute complications</b> |                  |                  |                        |                     |                        |                     |
| Myocarditis                        | 0/NR (0)         | 0/80842 (0)      | -                      | -                   | -                      | -                   |
| Heart failure                      | n < 5            | 50/79893 (0.06)  | NR                     | NR                  | NR                     | NR                  |
| Venous thromboembolism             | 14/8785 (0.16)   | 68/78872 (0.09)  | 0.07 (-0.01 to 0.16)   | 1.85 (1.04 to 3.28) | 0.07 (-0.01 to 0.16)   | 1.82 (1.02 to 3.25) |
| Peripheral vascular disease        | n < 5            | 7/80232 (0.01)   | NR                     | NR                  | NR                     | NR                  |
| Ischaemic stroke or TIA            | NR               | 79/78411 (0.10)  | NR                     | NR                  | NR                     | NR                  |
| Cerebral haemorrhage               | 0/8947 (0.00)    | 10/80462 (0.01)  | .                      | .                   | .                      | .                   |
| Guillain-Barré syndrome            | 0/8976 (0)       | 0/80853 (0)      | -                      | -                   | -                      | -                   |
| Encephalitis                       | 0/8975 (0)       | n < 5            | -                      | -                   | -                      | -                   |
| Psychosis                          | 0/8944 (0)       | 23/80244 (0.03)  | -                      | -                   | -                      | -                   |
| Kawasaki disease                   | 0/NR (0)         | 0/80882 (0)      | -                      | -                   | -                      | -                   |
| PIMS                               | 0/8976 (0)       | 0/80826 (0)      | -                      | -                   | -                      | -                   |
| Acute kidney injury                | 35/8983 (0.39)   | 299/80894 (0.37) | 0.02 (-0.12 to 0.16)   | 1.05 (0.74 to 1.50) | 0.03 (-0.10 to 0.17)   | 1.08 (0.76 to 1.54) |
| <b>Chronic disease</b>             |                  |                  |                        |                     |                        |                     |
| Pulmonary disease                  | 11/8195 (0.13)   | 258/70721 (0.36) | -0.23 (-0.32 to -0.14) | 0.37 (0.20 to 0.67) | -0.22 (-0.31 to -0.13) | 0.38 (0.21 to 0.70) |
| Interstitial pulmonary fibrosis    | 0/8977 (0.00)    | 6/80800 (0.01)   | -                      | -                   | -                      | -                   |
| Cardiovascular disease             | 20/8146 (0.25)   | 209/71774 (0.29) | -0.05 (-0.16 to 0.07)  | 0.84 (0.53 to 1.33) | -0.04 (-0.15 to 0.08)  | 0.87 (0.55 to 1.38) |
| Diabetes mellitus                  | NR               | 50/77928 (0.06)  | NR                     | NR                  | NR                     | NR                  |
| Neurological disease               | 16/8028 (0.20)   | 189/69664 (0.27) | -0.07 (-0.18 to 0.03)  | 0.73 (0.44 to 1.22) | -0.05 (-0.16 to 0.05)  | 0.80 (0.48 to 1.33) |
| Neuropathies                       | 5/8537 (0.06)    | 100/75365 (0.13) | -0.07 (-0.13 to -0.02) | 0.44 (0.18 to 1.08) | -0.06 (-0.12 to -0.00) | 0.49 (0.20 to 1.21) |
| Psychiatric illness                | 16/8586 (0.19)   | 244/74641 (0.33) | -0.14 (-0.24 to -0.04) | 0.57 (0.34 to 0.94) | -0.10 (-0.20 to -0.00) | 0.65 (0.39 to 1.07) |
| Depression                         | n < 5            | 61/79616 (0.08)  | NR                     | NR                  | NR                     | NR                  |
| Anxiety disorders                  | 7/8786 (0.08)    | 172/77654 (0.22) | -0.14 (-0.21 to -0.07) | 0.36 (0.17 to 0.77) | -0.11 (-0.18 to -0.04) | 0.42 (0.20 to 0.90) |
| <b>Persisting symptoms</b>         |                  |                  |                        |                     |                        |                     |
| Dyspnoea                           | 54/8676 (0.62)   | 304/76728 (0.40) | 0.23 (0.05 to 0.40)    | 1.57 (1.18 to 2.10) | 0.25 (0.08 to 0.42)    | 1.66 (1.24 to 2.22) |
| Cough                              | 10/8677 (0.12)   | 192/77596 (0.25) | -0.13 (-0.21 to -0.05) | 0.47 (0.25 to 0.88) | -0.14 (-0.22 to -0.06) | 0.46 (0.24 to 0.86) |
| Anosmia                            | n < 5            | 0/80865 (0.00)   | NR                     | NR                  | NR                     | NR                  |
| Headache                           | 17/8400 (0.20)   | 166/73799 (0.22) | -0.02 (-0.12 to 0.08)  | 0.90 (0.55 to 1.48) | -0.00 (-0.10 to 0.10)  | 0.99 (0.60 to 1.63) |
| Fatigue related disorders          | 8/8809 (0.09)    | 92/78543 (0.12)  | -0.03 (-0.09 to 0.04)  | 0.78 (0.38 to 1.60) | -0.02 (-0.09 to 0.05)  | 0.83 (0.40 to 1.71) |

|                  |                |                  |                       |                     |                       |                     |
|------------------|----------------|------------------|-----------------------|---------------------|-----------------------|---------------------|
| Nonspecific pain | 14/8438 (0.17) | 162/74235 (0.22) | -0.05 (-0.15 to 0.04) | 0.76 (0.44 to 1.31) | -0.02 (-0.11 to 0.07) | 0.89 (0.51 to 1.55) |
|------------------|----------------|------------------|-----------------------|---------------------|-----------------------|---------------------|

RD = Risk difference, RR = Risk ratio, CI = Confidence interval, PS = Propensity score, TIA = transitory ischaemic attack, PIMS = Diagnoses related to paediatric inflammatory multisystemic syndrome, n < 5 = counts less than 5 cannot be reported due to Danish legislation, NR = not reported due to Danish data protection laws

**Table S15. Rates of health care utilisation 14 to 2 weeks before and 2 to 14 weeks after a SARS-CoV-2 test.**

Rates are reported as the number of events per 1000 individuals during the baseline and follow up period.

| Outcome              | Baseline period                                          |                                            |            | Follow up                                                |                                            |            | PERR (95% CI)       |
|----------------------|----------------------------------------------------------|--------------------------------------------|------------|----------------------------------------------------------|--------------------------------------------|------------|---------------------|
|                      | Non-hospitalised SARS-CoV-2, events (n/1000 individuals) | Test-negative, events (n/1000 individuals) | Rate ratio | Non-hospitalised SARS-CoV-2, events (n/1000 individuals) | Test-negative, events (n/1000 individuals) | Rate ratio |                     |
| GP                   | 5772/8983 (643)                                          | 67519/80894 (835)                          | 0.77       | 8339/8983 (928)                                          | 77819/80894 (962)                          | 0.96       | 1.25 (1.21 to 1.30) |
| Outpatient           | 4295/8983 (478)                                          | 58763/80894 (726)                          | 0.66       | 4991/8983 (556)                                          | 65068/80894 (804)                          | 0.69       | 1.05 (0.99 to 1.11) |
| Emergency department | 118/8983 (13)                                            | 1069/80894 (13)                            | 0.99       | 203/8983 (23)                                            | 1526/80894 (19)                            | 1.20       | 1.21 (0.93 to 1.56) |
| Hospitalisation      | 212/8983 (24)                                            | 3273/80894 (40)                            | 0.58       | 319/8983 (36)                                            | 4300/80894 (53)                            | 0.67       | 1.15 (0.95 to 1.38) |

CI = Confidence interval
